# Supplementary material
Source: Springer Nature journal article supplement (https://www.springermedizin.de/resource/supplementary/12871_2012_129_MOESM3_ESM.pdf/9428912)

# Difference Plot

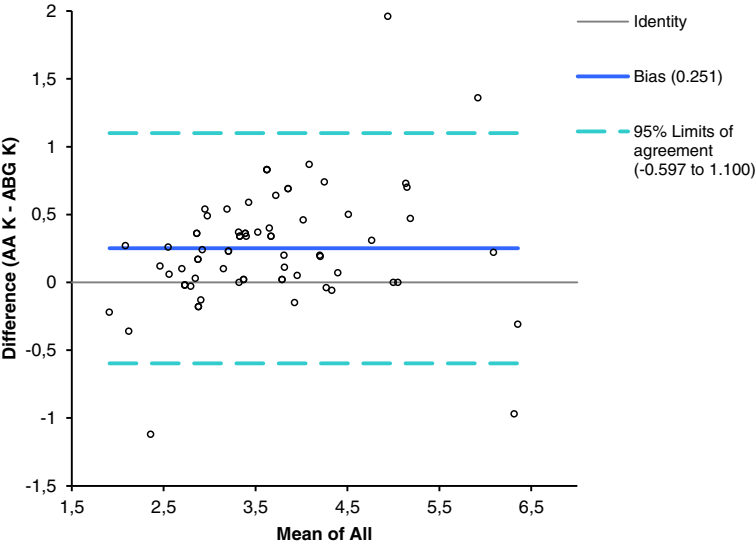

Supplement: MOESM3 [file 9428912]
